# Supplementary material
Source: PubMed Central journal article supplement (PMC6511755)
Supplement: ajtr0011-2140-f8.pdf [file ajtr0011-2140-f8.pdf]

# Vaccarin prevents ox-LDL-induced HUVEC injury

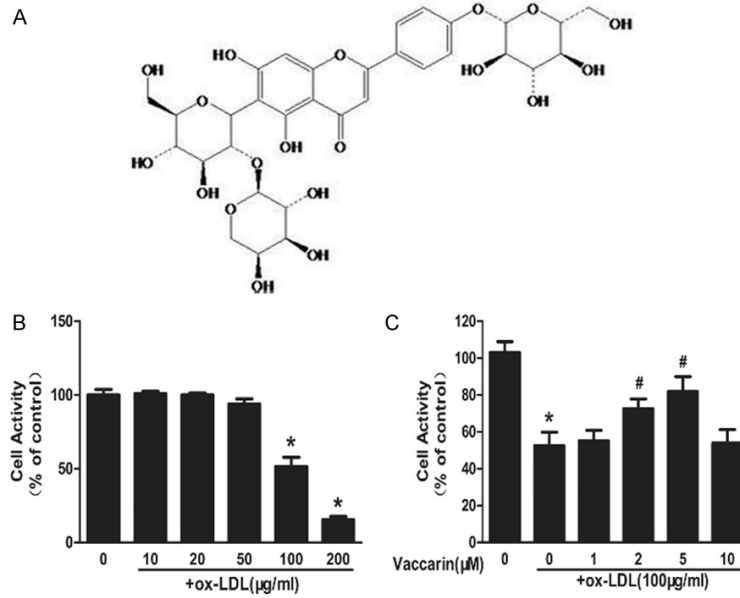

**Figure S1.** The different concentrations of ox-LDL and vaccarin used in this study. A. Chemical structure of vaccarin. B. HUVECs were exposed to various concentrations of ox-LDL (0, 10, 20, 50, 100, 200 µg/mL) for 24 h. The cell viability was detected by CCK-8. C. Different concentrations of vaccarin (0, 1, 2, 5, 10 µM) treatment ox-LDL (100 µg/mL) induced HUVECs for 24 h, the cell viability was detected by CCK-8. Values are mean ± S.D. \*P < 0.05 vs control, #P < 0.05 vs ox-LDL, n = 5/group.
